# Supplementary material
Source: PubMed Central journal article supplement (PMC3014641)
Supplement: supp_138.3.589_DEV056705TableS1.pdf [file supp_138.3.589_DEV056705TableS1.pdf]

**Table S1. Primer sequences**

| Construct                             | Primer sequences (5' to 3')                                                                        |
|---------------------------------------|----------------------------------------------------------------------------------------------------|
| <i>Myc-nanos1/pCS2+</i>               | GCTACGAATTCAATGGATGGCGGTCTCTGCTT<br>TCGATCTCGAGTCAGTGTCTCAGCTTTGGGT                                |
| <i>nanos1-Myc/pCS2+</i>               | GACTGAGGATCCAGAACAATTCCAACATGGA<br>GACTGTATCGATCGTGTCTCAGCTTTGGGTTA                                |
| <i>nanos1-TCEΔ/pSPORT1</i>            | CAATTCCAACATGGATCAGCCTCAGAGAGAAG<br>CTTCTCTGAGGCTGATCCATGTTGGAATTG                                 |
| <i>nanos1-3 nt insertion/pSPORT1</i>  | CAATTCCAACATGGATTTGGGCGGTCTCTGCTTTGAC<br>GTCAAAGCAGAGACCGCCAAATCCATGTTGGAATTG                      |
| <i>nanos1-6 nt insertion/pSPORT1</i>  | CAATTCCAACATGGATTTGACAGGCGGTCTCTGCTTTGAC<br>GTCAAAGCAGAGACCGCCTGTCAAATCCATGTTGGAATTG               |
| <i>nanos1-15 nt insertion/pSPORT1</i> | CAATTCCAACATGGATTTGACAGCACATGATGGCGGTCTCTGCTTTG<br>CAAAGCAGAGACCGCCATCATGTGCTGTCAAATCCATGTTGGAATTG |
| <i>nanos1-TCEΔ-Myc/pCS2+</i>          | CAATTCCAACATGGATCAGCCTCAGAGAGAAG<br>CTTCTCTGAGGCTGATCCATGTTGGAATTG                                 |
| <i>nanos1-TCE-Myc/pCS2+</i>           | GGGGGCTGCAGCATCGATGAGAAGGCGAAAG<br>CTTTCGCCTTCTCATCGATGCTGCAGCCCC                                  |

*β-globin* sequences inserted to create the mutants used in Fig. 4 are in bold.
